# Supplementary material for: Analysis of Progression Time in Pancreatic Cancer including Carcinoma In Situ Based on Magnetic Resonance Cholangiopancreatography Findings
Source: MDPI journal article supplement (doi:10.3390/diagnostics11101858), 2021-10-09
Supplement: s1 [file s1]

**Supplementary Table S1.** Diagnosis and first-time tumor detection in each patient

| <b>Patient No.</b> | <b>Final tumor size (mm)</b> | <b>Time to diagnosis (months)</b> | <b>Tumor size at first detection (mm)*</b> | <b>First-time tumor detection image modality*</b> | <b>Time to first detection (months)*</b> |
|--------------------|------------------------------|-----------------------------------|--------------------------------------------|---------------------------------------------------|------------------------------------------|
| 1                  | 0 <sup>†</sup>               | 23                                | –                                          | –                                                 | –                                        |
| 2                  | 0 <sup>†</sup>               | 18                                | –                                          | –                                                 | –                                        |
| 3                  | 0 <sup>†</sup>               | 26                                | –                                          | –                                                 | –                                        |
| 4                  | 3                            | 50                                | 4                                          | CT                                                | 49                                       |
| 5                  | 14                           | 55                                | 12                                         | CT                                                | 54                                       |
| 6                  | 16                           | 26                                | 8                                          | CT                                                | 16                                       |
| 7                  | 20                           | 28                                | 4                                          | EUS                                               | 11                                       |
| 8                  | 28                           | 14                                | 11                                         | CT                                                | 11                                       |
| 9                  | 36                           | 39                                | 7                                          | EUS                                               | 16                                       |

\* Based on the retrospective analysis performed by two independent reviewers. <sup>†</sup>CIS: Patients with CIS were treated as censored in the analysis of first tumor detection. Abbreviations: CIS, carcinoma in situ; CT, computed tomography; EUS, endoscopic ultrasound; MRI, magnetic resonance imaging.
